# Supplementary material for: Contrastive self-supervised clustering of scRNA-seq data
Source: BMC Bioinformatics. 2021 May 27;22:280. doi: 10.1186/s12859-021-04210-8 (PMC8157426; doi:10.1186/s12859-021-04210-8)
Supplement: Supplementary file 1 — Additional file 1. Supplementary method (Contrastive loss); Supplementary Tables S1 to S8; Supplementary Figures S1 to S5. [file 12859_2021_4210_MOESM1_ESM.pdf]

# **Contrastive self-supervised clustering of scRNA-seq data**

## **Supplementary Materials**

Madalina Ciortan, Matthieu Defrance

Interuniversity Institute of Bioinformatics in Brussels

Université Libre de Bruxelles, Belgium

Corresponding author: [matthieu.dc.defrance@ulb.ac.be](mailto:matthieu.dc.defrance@ulb.ac.be)

## Contrastive loss

The contrastive loss proposed in [1] is applied on this final layer in order to guide the model to map similar views to neighboring representations and dissimilar ones to non-neighboring ones. Given a minibatch with  $N$  samples, the two sample views are concatenated and create a structure indexed by  $1 \leq i \leq 2N$ , where  $pair(i)$  is the batch index of the pair for sample  $i$ ,  $z_i$  is the embedding of  $x_i$ . The loss takes the form:

$$L^{contrastive} = \sum_{i=1}^{2N} L_i^{contrastive}, \text{ with}$$

$$L_i^{contrastive} = -\log \frac{\exp(z_i \cdot z_{pair(i)}/\tau)}{\sum_{j=1}^{2N} 1_{i \neq j} \exp(z_i \cdot z_{pair(i)}/\tau)}$$

where  $pair(i)$  is the batch index of the pair for **sample  $i$** ,  $z_i$  is the embedding of  $x_i$ ,  $z_i \cdot z_{pair(i)}$  represents the dot product between the normalized embedding vectors,  $\tau$  is a temperature parameter set in our experiments to the recommended value of 0.07,  $1_B \in \{0,1\}$  is the indicator function returning 1 iff  $B$  evaluates to true, or **explicitly  $1_{i \neq j} = 1$  if  $i \neq j$  and  $1_{i \neq j} = 0$  if  $i = j$ .**

|    | Method           | Requires<br>number<br>of<br>clusters | Programming<br>language | Availability                                                                                                                                                                                                                                                                                                                                                     |
|----|------------------|--------------------------------------|-------------------------|------------------------------------------------------------------------------------------------------------------------------------------------------------------------------------------------------------------------------------------------------------------------------------------------------------------------------------------------------------------|
| 1  | PCA + K-Means    | yes                                  | Python                  | <a href="https://scikit-learn.org/stable/modules/generated/sklearn.decomposition.PCA.html">https://scikit-learn.org/stable/modules/generated/sklearn.decomposition.PCA.html</a><br><br><a href="https://scikit-learn.org/stable/modules/generated/sklearn.cluster.KMeans.html">https://scikit-learn.org/stable/modules/generated/sklearn.cluster.KMeans.html</a> |
| 2  | scDeepClustering | yes                                  | Python                  | <a href="https://github.com/ttgump/scDeepCluster">https://github.com/ttgump/scDeepCluster</a>                                                                                                                                                                                                                                                                    |
| 3  | scziDesk         | yes                                  | Python                  | <a href="https://github.com/xuebaliang/scziDesk">https://github.com/xuebaliang/scziDesk</a>                                                                                                                                                                                                                                                                      |
| 4  | scanpy/Seurat    | no                                   | Python                  | <a href="https://scanpy.readthedocs.io/en/stable/tutorials.html#clustering">https://scanpy.readthedocs.io/en/stable/tutorials.html#clustering</a>                                                                                                                                                                                                                |
| 5  | desc             | no                                   | Python                  | <a href="https://github.com/eleozzr/desc">https://github.com/eleozzr/desc</a>                                                                                                                                                                                                                                                                                    |
| 6  | scRNA            | yes                                  | Python                  | <a href="https://github.com/nicococo/scRNA">https://github.com/nicococo/scRNA</a>                                                                                                                                                                                                                                                                                |
| 7  | scedar           | no                                   | Python                  | <a href="https://scedar.readthedocs.io/en/latest/index.html">https://scedar.readthedocs.io/en/latest/index.html</a>                                                                                                                                                                                                                                              |
| 8  | cidr             | yes                                  | R                       | <a href="https://github.com/VCCRI/CIDR">https://github.com/VCCRI/CIDR</a>                                                                                                                                                                                                                                                                                        |
| 9  | soup             | yes                                  | R                       | <a href="https://rdr.io/github/lingxuez/SOUP/">https://rdr.io/github/lingxuez/SOUP/</a>                                                                                                                                                                                                                                                                          |
| 10 | scvi             | no                                   | R                       | <a href="https://github.com/YosefLab/scvi-tools">https://github.com/YosefLab/scvi-tools</a>                                                                                                                                                                                                                                                                      |
| 11 | raceid           | no                                   | R                       | <a href="https://cran.r-project.org/web/packages/RaceID/vignettes/RaceID.html">https://cran.r-project.org/web/packages/RaceID/vignettes/RaceID.html</a>                                                                                                                                                                                                          |

**Table S1.** Accessibility and programming language of benchmarked methods.

|    | Dataset Name | Size (cells x genes) | Sparsity | Max value | Mean | Median | Skew | Kurtosis |
|----|--------------|----------------------|----------|-----------|------|--------|------|----------|
| 1  | data_-1c4    | 1000 x 2500          | 27.90%   | 2675      | 34   | 10     | 6    | 49       |
| 2  | data_0c4     | 1000 x 2500          | 34.23%   | 2675      | 36   | 12     | 6    | 45       |
| 3  | data_1.5c4   | 1000 x 2500          | 50.77%   | 2675      | 45   | 15     | 5    | 34       |
| 4  | data_1c4     | 1000 x 2500          | 44.39%   | 2675      | 41   | 14     | 5    | 38       |
| 5  | data_1c8     | 2000 x 2500          | 46.88%   | 2282      | 43   | 12     | 5    | 27       |
| 6  | data_-1c8    | 2000 x 2500          | 29.72%   | 2282      | 34   | 9      | 5    | 36       |
| 7  | data_0c8     | 2000 x 2500          | 36.35%   | 2282      | 37   | 10     | 5    | 33       |
| 8  | data_1.5c8   | 2000 x 2500          | 53.39%   | 2282      | 48   | 13     | 4    | 24       |
| 9  | data_0c16    | 4000 x 2500          | 34.43%   | 2516      | 36   | 11     | 6    | 46       |
| 10 | data_1.5c16  | 4000 x 2500          | 51.38%   | 2516      | 46   | 14     | 5    | 35       |
| 11 | data_-1c16   | 4000 x 2500          | 27.92%   | 2516      | 34   | 10     | 6    | 51       |
| 12 | data_1c16    | 4000 x 2500          | 44.84%   | 2516      | 42   | 13     | 5    | 39       |

**Table S2.** Descriptive statistics of balanced simulated dataset. All statistics (mean, median, skew, kurtosis) have been computed only on the non-zero values.

|    | <b>Dataset Name</b> | <b>Size (cells x genes)</b> | <b>Sparsity</b> | <b>Max value</b> | <b>Mean</b> | <b>Median</b> | <b>Skew</b> | <b>Kurtosis</b> |
|----|---------------------|-----------------------------|-----------------|------------------|-------------|---------------|-------------|-----------------|
| 1  | data_-1c4           | 3000 x 2500                 | 28.68%          | 3019             | 34          | 10            | 7           | 73              |
| 2  | data_0c4            | 3000 x 2500                 | 35.24%          | 3019             | 37          | 11            | 7           | 67              |
| 3  | data_1.5c4          | 3000 x 2500                 | 52.20%          | 3019             | 46          | 14            | 6           | 51              |
| 4  | data_1c4            | 3000 x 2500                 | 45.68%          | 3019             | 42          | 13            | 6           | 57              |
| 5  | data_1c8            | 3000 x 2500                 | 45.62%          | 3333             | 42          | 13            | 6           | 57              |
| 6  | data_-1c8           | 3000 x 2500                 | 28.64%          | 3333             | 34          | 10            | 7           | 74              |
| 7  | data_0c8            | 3000 x 2500                 | 35.19%          | 3333             | 37          | 11            | 7           | 68              |
| 8  | data_1.5c8          | 3000 x 2500                 | 52.11%          | 3333             | 46          | 14            | 6           | 51              |
| 9  | data_0c16           | 3000 x 2500                 | 35.19%          | 3134             | 37          | 11            | 7           | 66              |
| 10 | data_1.5c16         | 3000 x 2500                 | 52.14%          | 3134             | 46          | 14            | 6           | 50              |
| 11 | data_-1c16          | 3000 x 2500                 | 28.63%          | 3134             | 34          | 10            | 7           | 72              |
| 12 | data_1c16           | 3000 x 2500                 | 45.63%          | 3134             | 42          | 13            | 6           | 56              |

**Table S3.** Descriptive statistics of imbalanced simulated dataset. All statistics (mean, median, skew, kurtosis) have been computed only on the non-zero values.

|    | Dataset Name                 | Sparsity | Max value | Mean | Median | Skew | Kurtosis |
|----|------------------------------|----------|-----------|------|--------|------|----------|
| 1  | Quake Smart seq2 Trachea     | 85.48%   | 678254    | 219  | 62     | 68   | 6354     |
| 2  | Quake10x Bladder             | 86.94%   | 2959      | 5    | 1      | 17   | 686      |
| 3  | Quake10x Spleen              | 94.34%   | 2324      | 3    | 1      | 25   | 2431     |
| 4  | Quake Smart seq2 Diaphragm   | 91.35%   | 208892    | 249  | 45     | 46   | 2849     |
| 5  | Quake10x Limb Muscle         | 93.57%   | 1259      | 3    | 1      | 23   | 992      |
| 6  | Quake Smart seq2 Limb Muscle | 89.47%   | 1242300   | 316  | 78     | 102  | 18782    |
| 7  | Romanov                      | 85.92%   | 8642      | 3    | 1      | 94   | 19080    |
| 8  | Adam                         | 92.33%   | 4929      | 3    | 1      | 89   | 12820    |
| 9  | Muraro                       | 73.02%   | 1597      | 4    | 2      | 43   | 2304     |
| 10 | Young                        | 94.70%   | 4666      | 4    | 1      | 45   | 4004     |
| 11 | Quake Smart seq2 Lung        | 89.08%   | 822470    | 320  | 65     | 82   | 10691    |
| 12 | 10X PBMC                     | 92,23%   | 777       | 3.24 | 1      | 15   | 460      |
| 13 | Mouse ES Cell                | 65,76%   | 2309      | 2.42 | 1      | 25   | 4949     |
| 14 | Worm neuron cell             | 98,61%   | 219       | 1.76 | 1      | 18   | 970      |
| 15 | Mouse Bladder cell           | 94,86 %  | 303       | 2.06 | 1      | 16   | 525      |

**Table S4.** Descriptive statistics of single-cell datasets. All statistics (mean, median, skew, kurtosis) have been computed only on the non-zero values.

|    | Dataset Name                 | Optimal input size | Silhouette score | AIC      |
|----|------------------------------|--------------------|------------------|----------|
| 1  | Quake Smart seq2 Trachea     | 500                | 0.61             | -779753  |
| 2  | Quake10x Bladder             | 500                | 0.81             | -1533450 |
| 3  | Quake10x Spleen              | 500                | 0.70             | -5948416 |
| 4  | Quake Smart seq2 Diaphragm   | 1000               | 0.84             | -502236  |
| 5  | Quake10x Limb Muscle         | 500                | 0.62             | -2209972 |
| 6  | Quake Smart seq2 Limb Muscle | 500                | 0.80             | -629835  |
| 7  | Romanov                      | 500                | 0.53             | -1712599 |
| 8  | Adam                         | 500                | 0.51             | -2018976 |
| 9  | Muraro                       | 500                | 0.65             | -1248460 |
| 10 | Young                        | 1000               | 0.46             | -2994687 |
| 11 | Quake Smart seq2 Lung        | 1000               | 0.60             | -920851  |
| 12 | 10X PBMC                     | 500                | 0.56             | -2580395 |
| 13 | Mouse ES Cell                | 1000               | 0.61             | -1535567 |
| 14 | Worm neuron cell             | 5000               | 0.32             | -2021032 |
| 15 | Mouse Bladder cell           | 1500               | 0.36             | -1586925 |

**Table S5.** Optimal number of most variable genes per dataset, selecting by the underlying Silhouette scores, averaged over 3 runs for each experiment. The corresponding Silhouette and AIC scores have been presented in the last 2 columns.

|    | Dataset Name                    | Kmeans      | Leiden<br>(*) | Birch       | GMM         | Mean<br>Shift (*) | Spectral<br>Clustering | Ward<br>Hierarchical<br>Clustering |
|----|---------------------------------|-------------|---------------|-------------|-------------|-------------------|------------------------|------------------------------------|
| 1  | Quake Smart seq2<br>Trachea     | 0.84        | 0.6           | 0.82        | 0.84        | 0.72              | 0.79                   | <b>0.87</b>                        |
| 2  | Quake10x Bladder                | 0.8         | 0.57          | 0.79        | 0.8         | 0.77              | 0.8                    | <b>0.81</b>                        |
| 3  | Quake10x Spleen                 | 0.79        | 0.47          | 0.69        | 0.71        | 0.74              | 0.72                   | <b>0.84</b>                        |
| 4  | Quake Smart seq2<br>Diaphragm   | <b>0.96</b> | 0.85          | <b>0.96</b> | <b>0.96</b> | 0.93              | 0.95                   | <b>0.96</b>                        |
| 5  | Quake10x Limb<br>Muscle         | 0.97        | 0.81          | 0.94        | 0.94        | 0.79              | 0.94                   | <b>0.98</b>                        |
| 6  | Quake Smart seq2<br>Limb Muscle | <b>0.96</b> | 0.85          | 0.94        | 0.92        | 0.9               | 0.95                   | <b>0.96</b>                        |
| 7  | Romanov                         | <b>0.72</b> | 0.63          | 0.59        | 0.58        | 0.64              | 0.71                   | 0.68                               |
| 8  | Adam                            | 0.85        | 0.79          | 0.75        | 0.73        | 0.71              | 0.85                   | 0.82                               |
| 9  | Muraro                          | 0.86        | 0.77          | 0.83        | 0.83        | 0.81              | 0.82                   | 0.87                               |
| 10 | Young                           | 0.78        | 0.8           | 0.72        | 0.74        | 0.64              | 0.76                   | 0.77                               |
| 11 | Quake Smart seq2<br>Lung        | 0.77        | 0.76          | 0.77        | 0.74        | 0.74              | 0.76                   | 0.77                               |
| 12 | 10 PBMC                         | 0.73        | 0.67          | 0.69        | 0.69        | 0.73              | 0.71                   | 0.73                               |
| 13 | Mouse ES cells                  | 0.71        | 0.68          | 0.67        | 0.67        | 0.61              | 0.69                   | 0.75                               |
| 14 | Worm neuron cell                | 0.63        | 0.65          | 0.55        | 0.55        | 0.49              | 0.61                   | 0.64                               |
| 15 | Mouse bladder cell              | 0.7         | 0.72          | 0.7         | 0.69        | 0.71              | 0.66                   | 0.69                               |
|    | <b>Average score</b>            | 0.80        | 0.71          | 0.76        | 0.76        | 0.73              | 0.78                   | <b>0.81</b>                        |

**Table S6.** Comparison between 7 clustering methods, applied on the embedding learned with contrastive-sc. The results depict the average NMI score across 3 consecutive runs. The methods annotated with (\*) indicate those where the correct number of clusters has not been provided as input.

|    | Dataset Name                    | Kmeans      | Leiden<br>(*) | Birch | GMM  | Mean<br>Shift (*) | Spectral<br>Clustering | Ward<br>Hierarchical<br>Clustering |
|----|---------------------------------|-------------|---------------|-------|------|-------------------|------------------------|------------------------------------|
| 1  | Quake Smart seq2<br>Trachea     | 0.61        | 0.38          | 0.58  | 0.57 | 0.38              | 0.6                    | 0.59                               |
| 2  | Quake10x Bladder                | 0.81        | 0.28          | 0.8   | 0.8  | 0.7               | 0.81                   | 0.8                                |
| 3  | Quake10x Spleen                 | 0.7         | 0.21          | 0.47  | 0.51 | 0.47              | 0.65                   | 0.69                               |
| 4  | Quake Smart seq2<br>Diaphragm   | 0.84        | 0.49          | 0.84  | 0.84 | 0.69              | 0.83                   | 0.83                               |
| 5  | Quake10x Limb<br>Muscle         | 0.62        | 0.48          | 0.6   | 0.59 | 0.28              | 0.61                   | 0.61                               |
| 6  | Quake Smart seq2<br>Limb Muscle | 0.8         | 0.52          | 0.79  | 0.73 | 0.54              | 0.8                    | 0.8                                |
| 7  | Romanov                         | 0.53        | 0.41          | 0.39  | 0.34 | 0.39              | 0.53                   | 0.51                               |
| 8  | Adam                            | 0.51        | 0.4           | 0.42  | 0.41 | 0.24              | 0.5                    | 0.48                               |
| 9  | Muraro                          | 0.65        | 0.44          | 0.59  | 0.58 | 0.37              | 0.62                   | 0.66                               |
| 10 | Young                           | 0.46        | 0.46          | 0.34  | 0.36 | 0.18              | 0.43                   | 0.43                               |
| 11 | Quake Smart seq2<br>Lung        | 0.6         | 0.58          | 0.52  | 0.52 | 0.39              | 0.57                   | 0.6                                |
| 12 | 10 PBMC                         | 0.56        | 0.35          | 0.48  | 0.51 | 0.55              | 0.52                   | 0.52                               |
| 13 | Mouse ES cells                  | 0.61        | 0.27          | 0.48  | 0.49 | 0.41              | 0.59                   | 0.59                               |
| 14 | Worm neuron cell                | 0.32        | 0.3           | 0.2   | 0.21 | 0.04              | 0.3                    | 0.3                                |
| 15 | Mouse bladder cell              | 0.36        | 0.39          | 0.28  | 0.28 | 0.31              | 0.32                   | 0.33                               |
|    | <b>Average Score</b>            | <b>0.60</b> | 0.40          | 0.52  | 0.52 | 0.40              | 0.58                   | 0.58                               |

**Table S7.** Comparison between 7 clustering methods, applied on the embedding learned with contrastive-sc. The results depict the average Silhouette score across 3 consecutive runs. The methods annotated with (\*) indicate those where the correct number of clusters has not been provided as input.

|    | <b>Dataset Name</b>             | <b>Kmeans</b> | <b>Leiden<br/>(*)</b> | <b>Birch</b> | <b>GMM</b> | <b>Mean<br/>Shift (*)</b> | <b>Spectral<br/>Clustering</b> | <b>Ward<br/>Hierarchical<br/>Clustering</b> |
|----|---------------------------------|---------------|-----------------------|--------------|------------|---------------------------|--------------------------------|---------------------------------------------|
| 1  | Quake Smart seq2<br>Trachea     | 1118.05       | 1350.01               | 1031.58      | 1018.51    | 443.96                    | 1071.66                        | 1061.94                                     |
| 2  | Quake10x Bladder                | 7433.61       | 8414.36               | 7121.08      | 7343.4     | 3835.85                   | 7413.45                        | 7322                                        |
| 3  | Quake10x Spleen                 | 12509.95      | 8166.01               | 7920.46      | 8604.58    | 2679.72                   | 10896.19                       | 11350.73                                    |
| 4  | Quake Smart seq2<br>Diaphragm   | 5075.86       | 4261.39               | 5066.02      | 5065.46    | 2528.83                   | 4939.54                        | 4573.64                                     |
| 5  | Quake10x Limb<br>Muscle         | 3360.11       | 3684.95               | 3158.18      | 2957.01    | 793.63                    | 3240.69                        | 3291.62                                     |
| 6  | Quake Smart seq2<br>Limb Muscle | 4059.13       | 3789.95               | 3703.38      | 3594.93    | 1325.07                   | 3984.51                        | 3894.46                                     |
| 7  | Romanov                         | 2805.26       | 2511.01               | 1495.07      | 1522.04    | 631.15                    | 2709.36                        | 2373.46                                     |
| 8  | Adam                            | 2343.25       | 2035.34               | 1706.8       | 1534.43    | 304.43                    | 2288.52                        | 2056                                        |
| 9  | Muraro                          | 3118.36       | 2858.11               | 2696.22      | 2479.54    | 848.82                    | 2564.68                        | 3017.35                                     |
| 10 | Young                           | 3032.7        | 2708.99               | 1886.43      | 2075.11    | 229.35                    | 2704.98                        | 2721.43                                     |
| 11 | Quake Smart seq2<br>Lung        | 1454.1        | 1796.95               | 1293.09      | 1275.04    | 651.33                    | 1328.88                        | 1424.96                                     |
| 12 | 10 PBMC                         | 15187.7       | 11983.11              | 10833.4      | 9480.23    | 3904.49                   | 12120.96                       | 13331.2                                     |
| 13 | Mouse ES cells                  | 3925.63       | 2505.63               | 2103.28      | 2172.3     | 363.01                    | 3494.37                        | 3560.69                                     |
| 14 | Worm neuron cell                | 1188.78       | 1077.38               | 753.05       | 781.23     | 30.03                     | 1097.86                        | 1049.82                                     |
| 15 | Mouse bladder cell              | 4105.6        | 4449.99               | 2825.41      | 2835.4     | 763.63                    | 2280.47                        | 3774.22                                     |
|    | <b>Average score</b>            | <b>4714</b>   | 4106                  | 3572         | 3515       | 1288                      | 4142                           | 4320                                        |

**Table S8.** Comparison between 7 clustering methods, applied on the embedding learned with contrastive-sc. The results depict the average Calinski score across 3 consecutive runs. The methods annotated with (\*) indicate those where the correct number of clusters has not been provided as input.



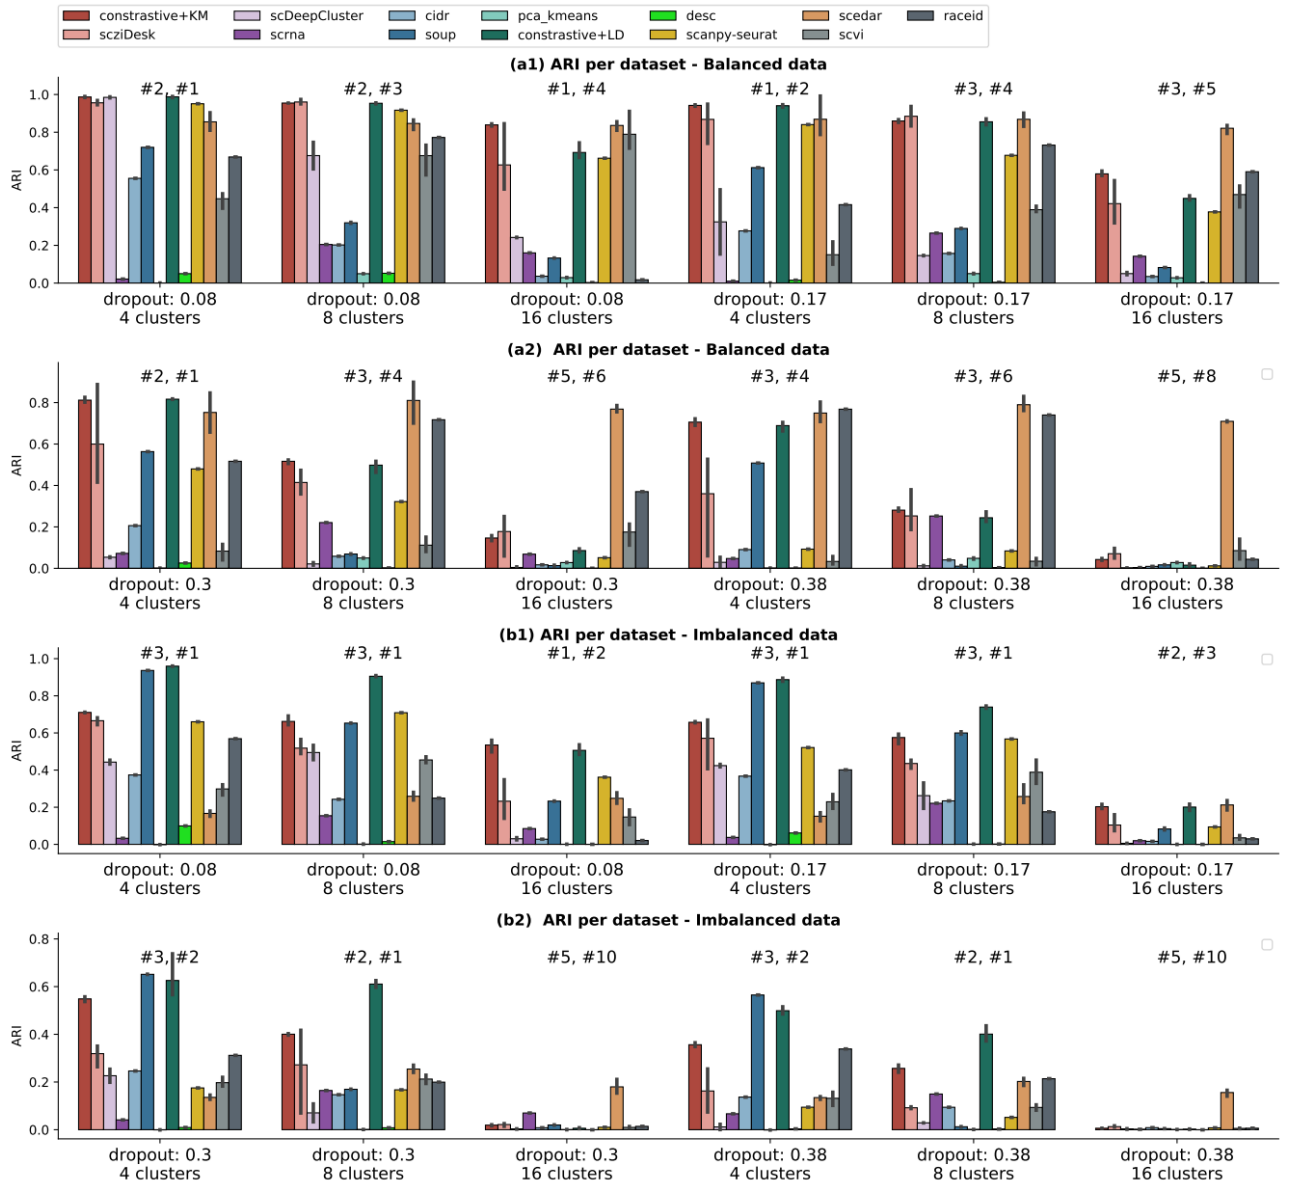

**Fig S1. Dataset ranking by ARI score for simulated data balanced (panel a1, a2) and imbalanced (panel b1, b2).** We studied 4 levels of dropout rate: 0.08 (a), 0.16 (b), 0.3 (c) and 0.38 (d). The level of dropout is reported by the simulation library and is lower than the data sparsity. For each setting 4, 8 and 16 clusters have been generated. The presented results assess the ARI score over 3 runs for each dataset using different initialization seeds. A dataset level analysis has been depicted in panels a and b, where the method ranking of contrastive+KMeans and contrastive+Leiden has been depicted as # rank number, representing the position our scores had within the 13 explored techniques.

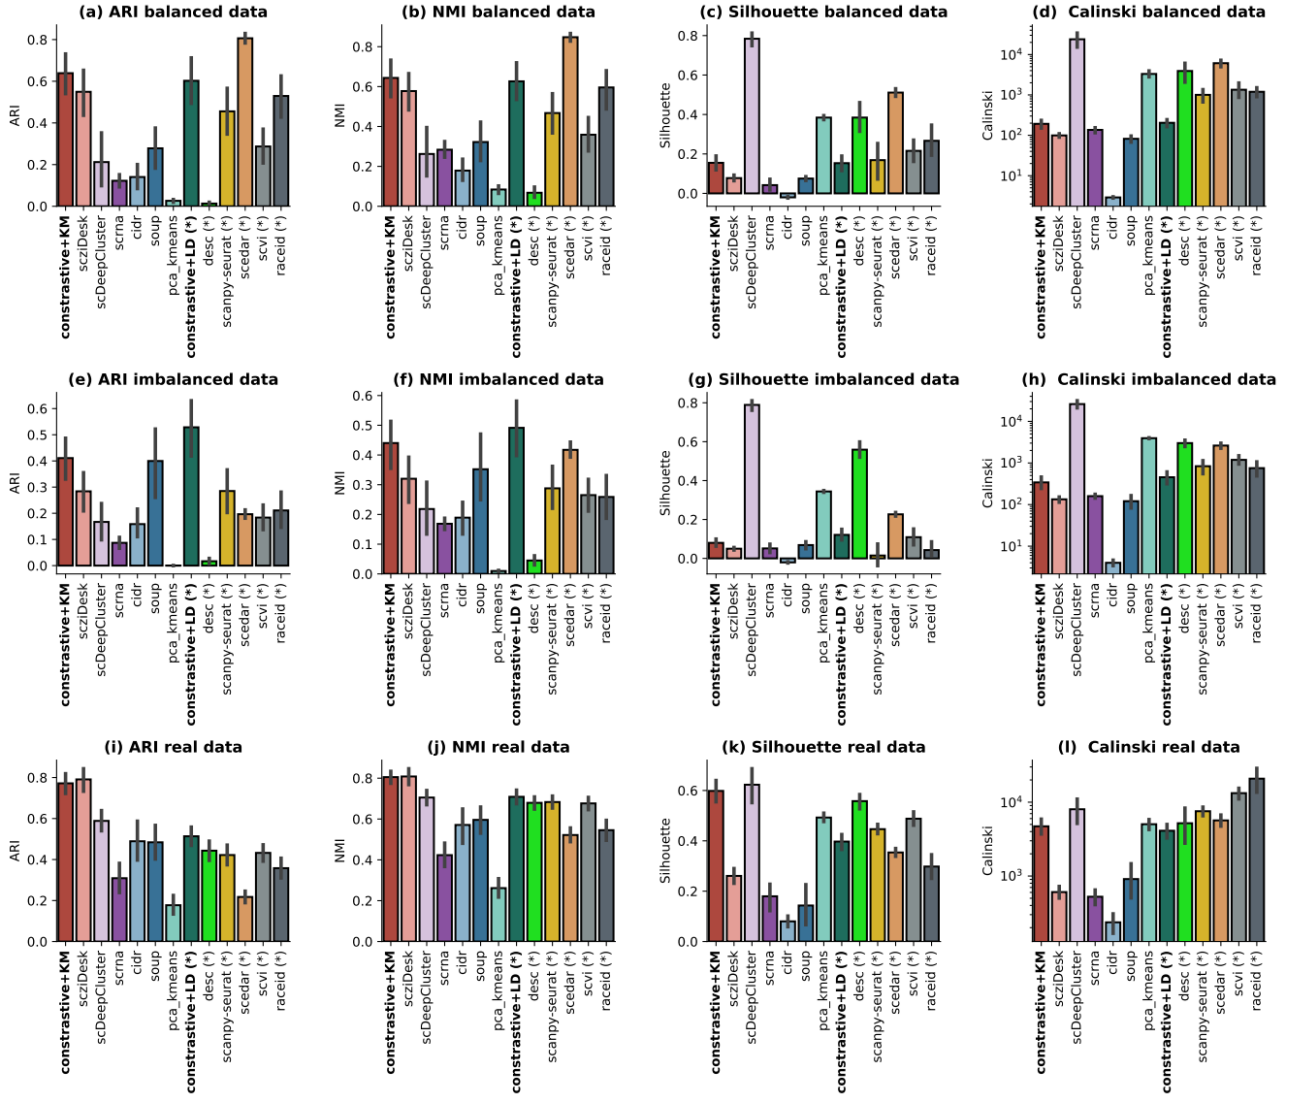

**Fig S2.** Overview of all explored datasets (simulated balanced, imbalanced and real world) using all selected scores (ARI, NMI, Silhouette, Calinski).

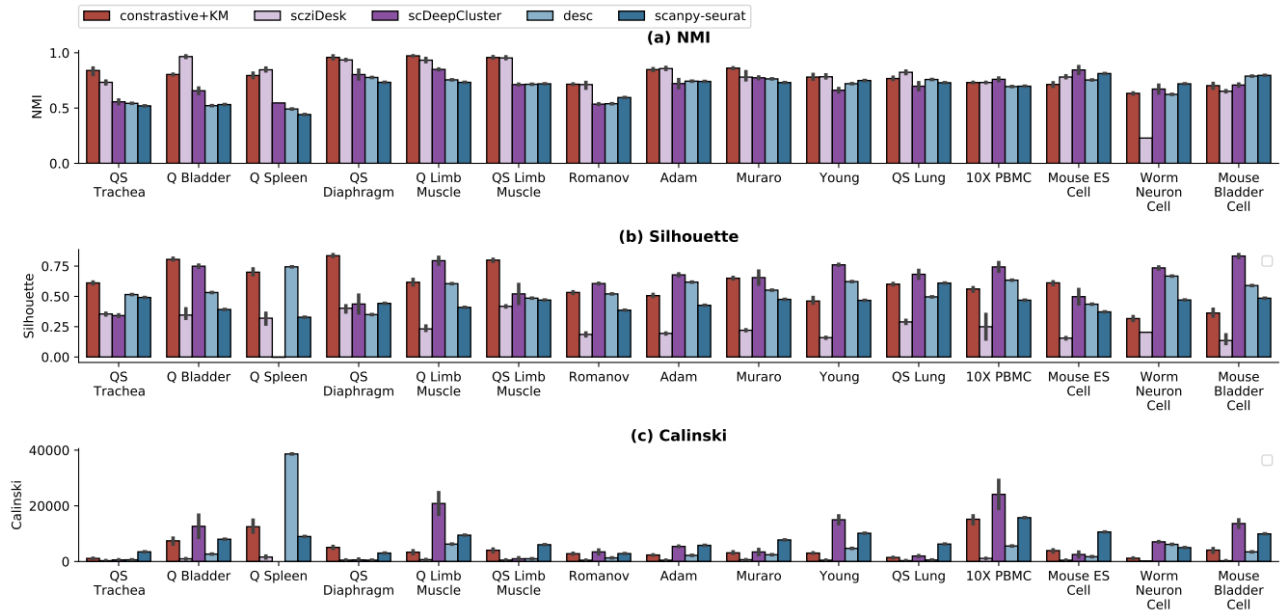

**Fig S3.** Method results on biological datasets in terms of NMI, Silhouette and Calinski scores. For a compact display, we selected the top 5 best performing methods. The results aggregate 3 consecutive runs of all 13 explored methods over the 15 biological datasets. For simplicity, only top 5 performing methods have been selected.

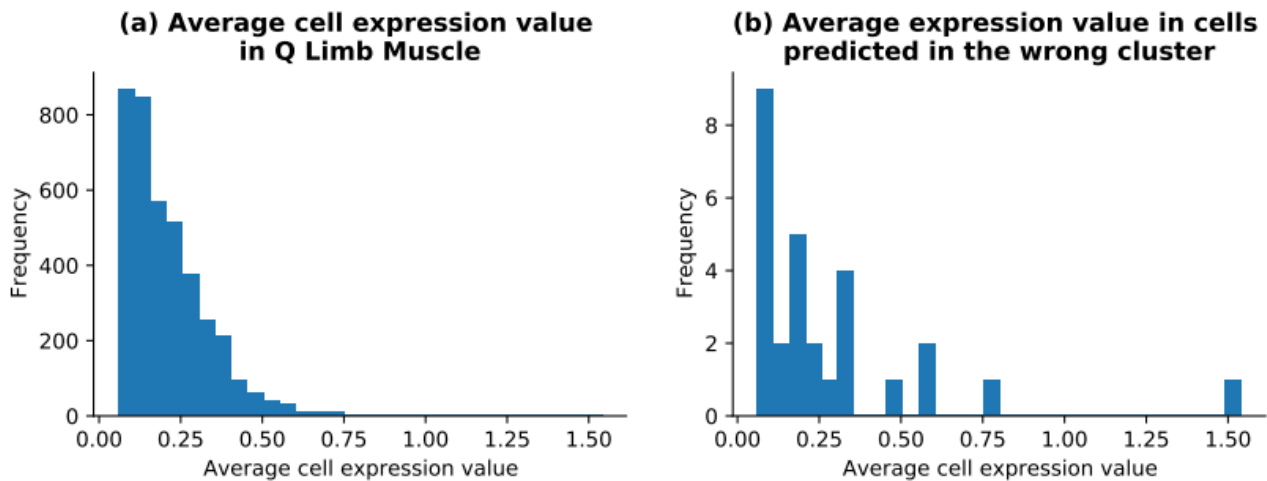

**Fig S4.** Distribution of average cell expression values across all cells in Q Limb Muscle dataset (panel a) compared to the cells predicted by contrastive+Kmeans in the wrong cluster. Most of the incorrect predictions have been made on cells having low expression values.

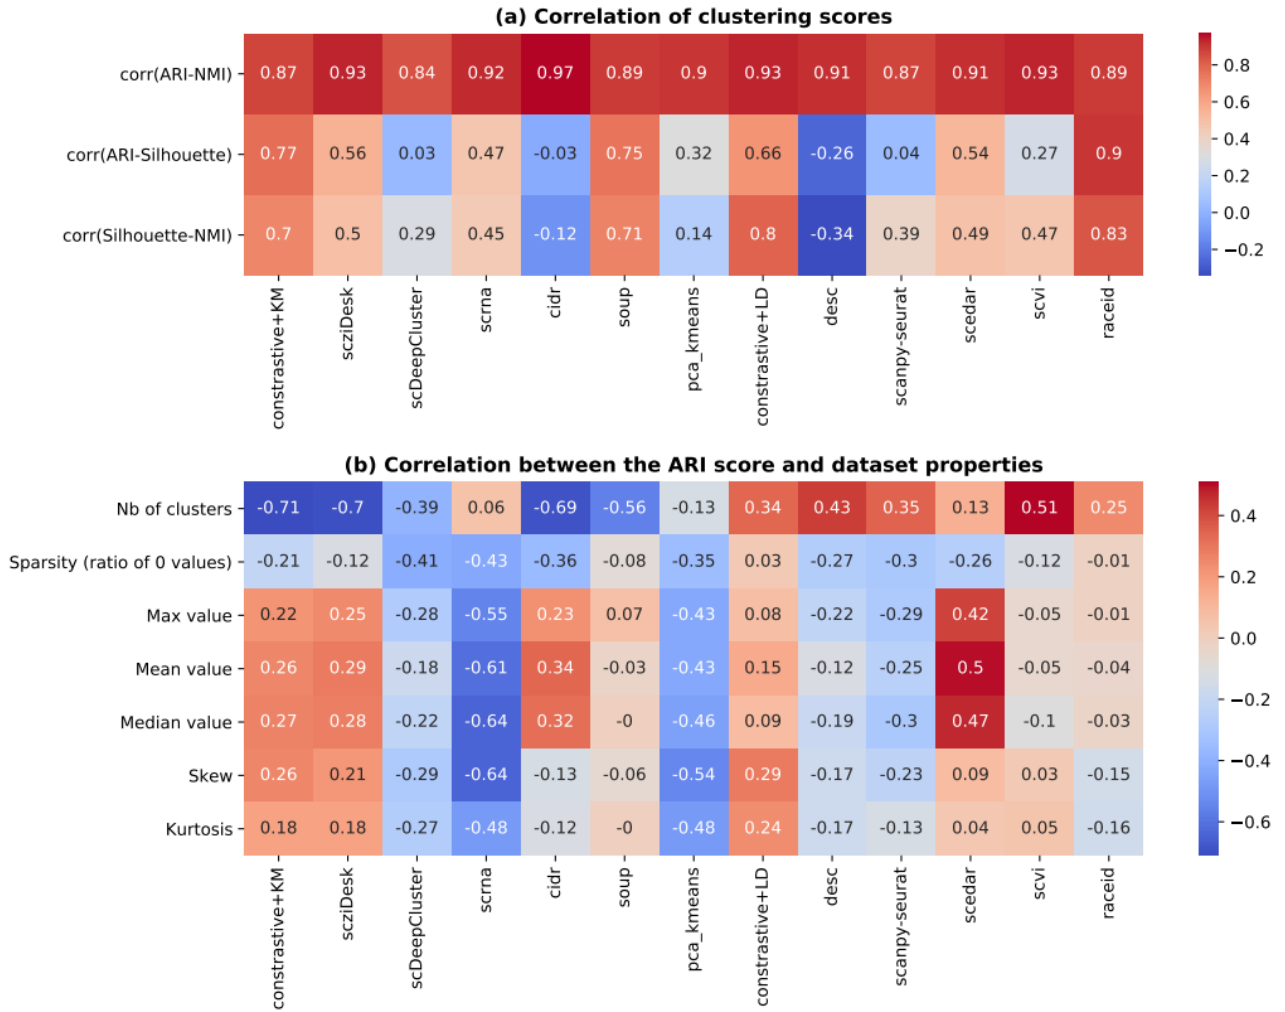

**Fig S5. Meta-analysis of explored methods** The Pearson correlation between ARI, Silhouette scores and the remaining measures has been illustrated in panel a. The correlation is computed for each method, by comparing the ARI, Silhouette and NMI scores obtained after 3 runs on all real-world datasets. The ARI score is significantly correlated with NMI across all experiments. However, the internal scores are not always aligned with external measures. Weaker correlations with internal quality measures indicate that identified clusters are well separated but do not match the ground truth and conversely. The Pearson correlation between dataset specificities and method performance as ARI score has been depicted in panel b. The input data consisted of the ARI scores reported on all real-world scRNA-seq datasets and each dataset's properties. For each dataset, we explored the number of clusters, the sparsity ratio, the mean/median/max values, the skew and the kurtosis. Some methods (contrastive+KMeans, scziDesk, cider) work best on a reduced number of clusters, while others are impacted negatively by data sparsity (e.g. scDeepCluster, scrna).
